# Supplementary material for: LaTaON2–BaTaO2N solid solutions for photocatalytic water oxidation
Source: Royal Society of Chemistry journal article supplement (doi:10.1039/d1qi00598g), 2021-01-01
Supplement: d1qi00598g1.pdf [file d1qi00598g1.pdf]

## Supporting Information

# Steering visible-light-driven photocatalytic activity by forming LaTaON<sub>2</sub>-BaTaO<sub>2</sub>N solid solutions for water oxidation into oxygen

Yuwei Zhang<sup>a</sup> and Xiaoxiang Xu<sup>a,\*</sup>

<sup>a</sup> Shanghai Key Lab of Chemical Assessment and Sustainability, School of Chemical Science and Engineering, Clinical and Central Lab, Putuo People's Hospital, Tongji University, Shanghai,

China Address here. Email: [xxxu@tongji.edu.cn](mailto:xxxu@tongji.edu.cn), telephone: +86-21-65986919

Corresponding author

Xiaoxiang Xu (Email: [xxxu@tongji.edu.cn](mailto:xxxu@tongji.edu.cn); Tel: +86-021-65986919)

Supporting information content

Number of pages: 19 (S1-S19)

Number of figures: 11 (Figure S1 to S11)

Number of tables: 7 (Table S1 to S7)

## Content

### Figure:

**Figure S1.** Spectra of Xenon lamp coupled with a cut-off filter ( $\lambda \geq 420$  nm). S4

**Figure S2.** SEM-EDX mapping of sample  $\text{La}_{0.2}\text{Ba}_{0.8}\text{TaO}_{y+1}\text{N}_{2-y}$  ( $x = 0.8$ ). S5

**Figure S3.** SEM-EDX element analysis of sample  $\text{La}_{0.2}\text{Ba}_{0.8}\text{TaO}_{y+1}\text{N}_{2-y}$  ( $x = 0.8$ ). S6

**Figure S4.** Transmission electron microscopy (TEM) and high-resolution transmission electron microscopy (HRTEM) images of (a, d)  $\text{LaTaON}_2$  ( $x = 0.0$ ), (b, e)  $\text{La}_{0.2}\text{Ba}_{0.8}\text{TaO}_{y+1}\text{N}_{2-y}$  ( $x = 0.8$ ) and (c, f)  $\text{BaTaO}_2\text{N}$  ( $x = 1.0$ ). S7

**Figure S5.** X-ray photoelectron spectra of sample  $\text{La}_{1-x}\text{Ba}_x\text{TaO}_{y+1}\text{N}_{2-y}$  ( $0 \leq x, y \leq 1$ ): (a) La  $3d$  state; (b) Ba  $3d$  state. S8

**Figure S6.** Nitrogen adsorption-desorption isotherms of freshly prepared sample powder  $\text{La}_{1-x}\text{Ba}_x\text{TaO}_{y+1}\text{N}_{2-y}$  ( $0 \leq x, y \leq 1$ ), the calculated BET surface area and FWHM of XRD are tabulated on table S2. S9

**Figure S7.** photocatalytic oxygen evolution for  $\text{La}_{0.2}\text{Ba}_{0.8}\text{TaO}_{y+1}\text{N}_{2-y}$  ( $x = 0.8$ ) loaded with 2 wt%  $\text{CoO}_x$  under visible light illumination ( $\lambda \geq 420$  nm), sodium persulfate (0.05 M) or silver nitrate aqueous solution (0.05 M) was used as a sacrificial agent. S10

**Figure S8.** XRD pattern of  $\text{La}_{0.2}\text{Ba}_{0.8}\text{TaO}_{y+1}\text{N}_{2-y}$  ( $x = 0.8$ ) before and after oxidation treatment.

S11

**Figure S9.** Observed and calculated XRD pattern of  $\text{La}_{0.2}\text{Ba}_{0.8}\text{TaO}_{y+1}\text{N}_{2-y}$  ( $x = 0.8$ ) after photocatalytic experiment ( $R_p = 4.05\%$ ,  $R_{wp} = 3.10\%$ ,  $\chi^2 = 1.085$ ). S12

**Figure S10.** X-ray photoelectron spectra of  $\text{La}_{0.2}\text{Ba}_{0.8}\text{TaO}_{y+1}\text{N}_{2-y}$  ( $x = 0.8$ ) before and after photocatalytic experiment. S13

**Figure S11.** (a) Linear sweep voltammetry (LSV) and (b) impedance spectra for photoelectrode fabricated from samples  $\text{LaTaON}_2$  ( $x = 0.0$ ),  $\text{La}_{0.2}\text{Ba}_{0.8}\text{TaO}_{y+1}\text{N}_{2-y}$  ( $x = 0.8$ ) and  $\text{BaTaO}_2\text{N}$  ( $x = 1.0$ ). S14

**Tables:**

**Table S1.** BET surface area and FWHM of samples  $\text{La}_{1-x}\text{Ba}_x\text{TaO}_{y+1}\text{N}_{2-y}$  ( $0 \leq x, y \leq 1$ ) S15

**Table S2.** Element content from oxygen and nitrogen analysis and the calculated chemical formula S15

**Table S3.** XPS data on the peak fitting analysis for Ta 4f S16

**Table S4.** Peak positions on XPS analysis for La, Ba, Ta, O and N S17

**Table S5.** Unit parameters for  $\text{La}_{0.2}\text{Ba}_{0.8}\text{TaO}_{y+1}\text{N}_{2-y}$  ( $x = 0.8$ ) after photocatalytic experiment, standard deviation is included in the parenthesis. S17

**Table S6.**  $\text{O}_2$  evolution of some typical oxynitride and non-oxynitride photocatalysts under visible light illumination ( $\lambda \geq 420$  nm) S18

**Table S7.** Photocurrent densities (1.23 V vs. RHE) of  $\text{La}_{0.2}\text{Ba}_{0.8}\text{TaO}_{y+1}\text{N}_{2-y}$  ( $x = 0.8$ ) compared with other compounds under visible light illumination ( $\lambda \geq 420$  nm) S18

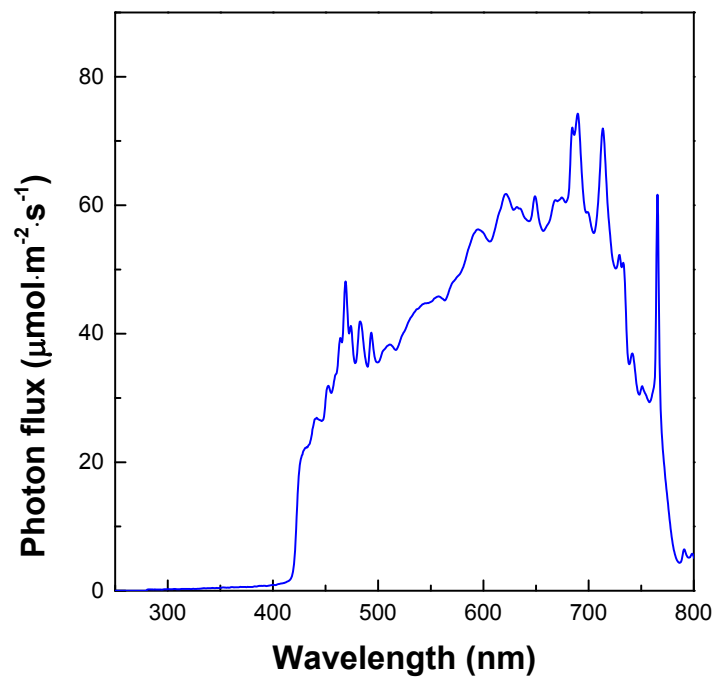

**Figure S1.** Spectra of Xenon lamp coupled with a cut-off filter ( $\lambda \geq 420$  nm).

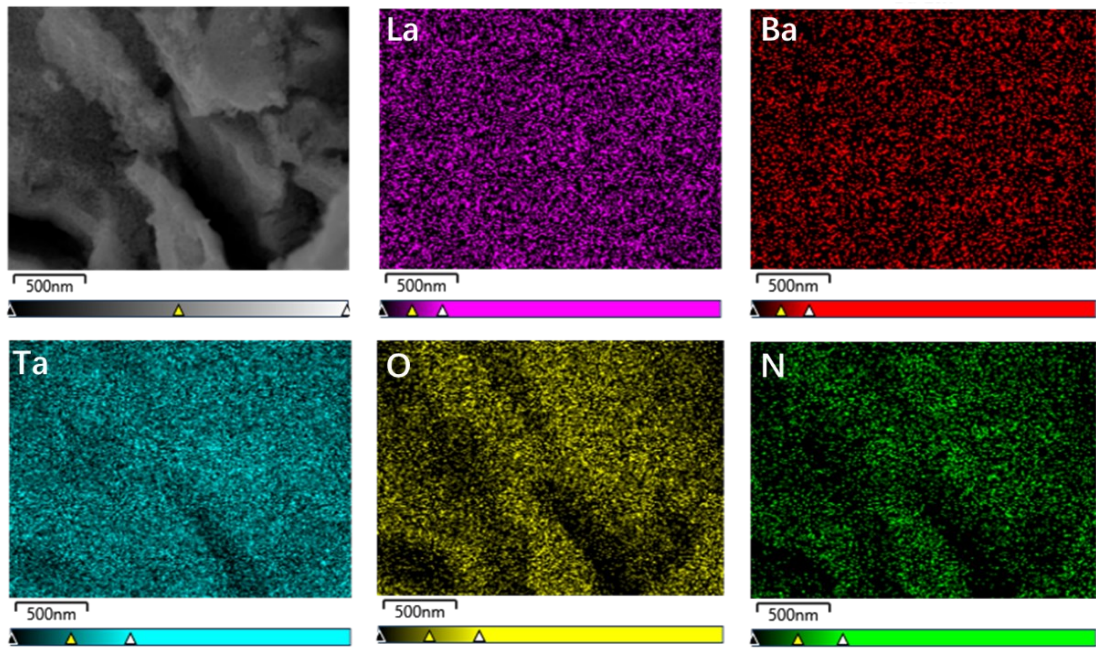

**Figure S2.** SEM-EDX mapping of sample  $\text{La}_{0.2}\text{Ba}_{0.8}\text{TaO}_{y+1}\text{N}_{2-y}$  ( $x = 0.8$ ).

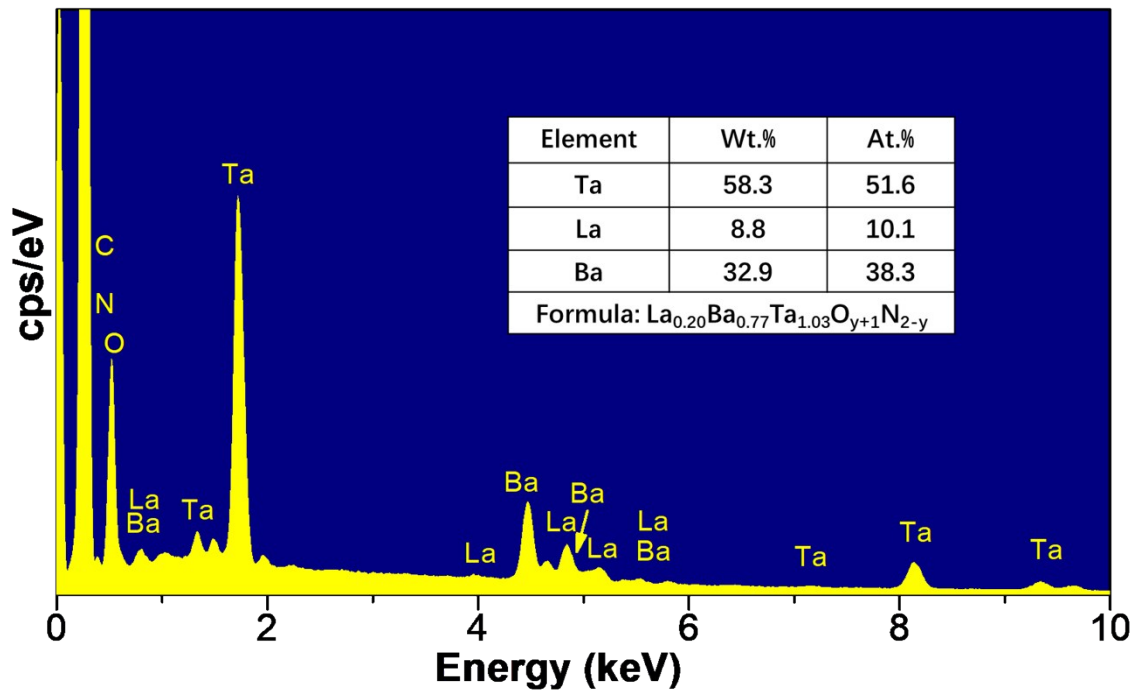

Figure S3. SEM-EDX element analysis of sample  $\text{La}_{0.2}\text{Ba}_{0.8}\text{TaO}_{y+1}\text{N}_{2-y}$  ( $x = 0.8$ ).

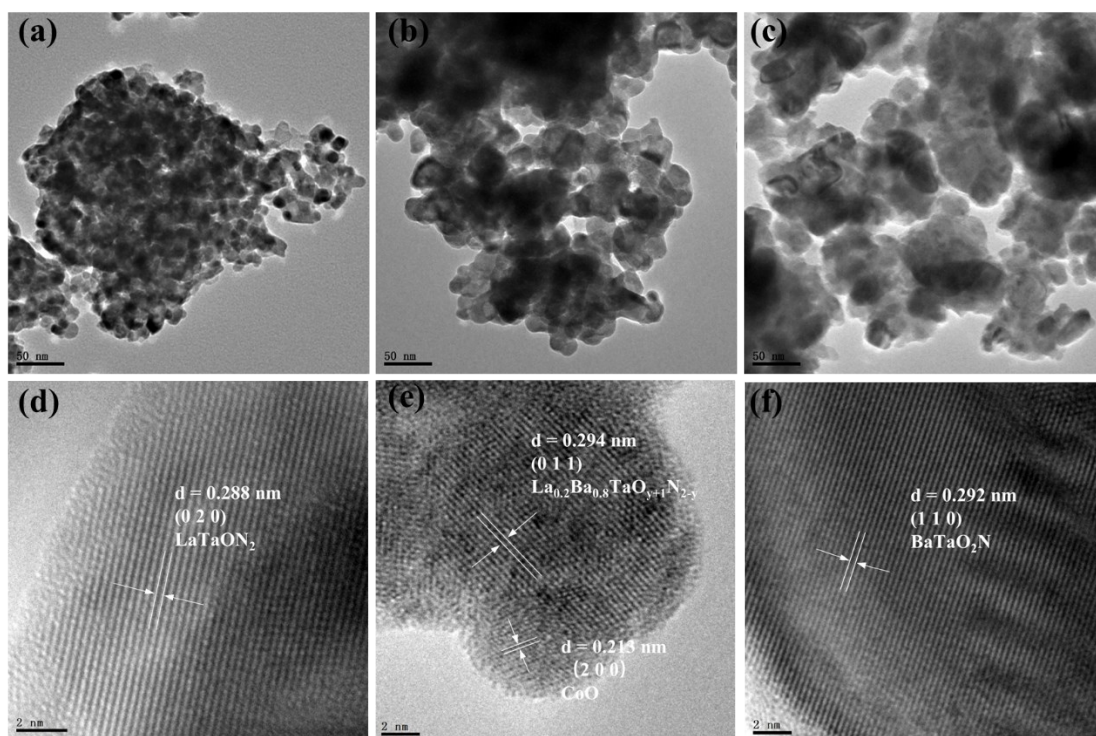

**Figure S4.** Transmission electron microscopy (TEM) and high-resolution transmission electron microscopy (HRTEM) images of (a, d)  $\text{LaTaON}_2$  ( $x = 0.0$ ), (b, e)  $\text{La}_{0.2}\text{Ba}_{0.8}\text{TaO}_{y+1}\text{N}_{2-y}$  ( $x = 0.8$ ) and (c, f)  $\text{BaTaO}_2\text{N}$  ( $x = 1.0$ ).

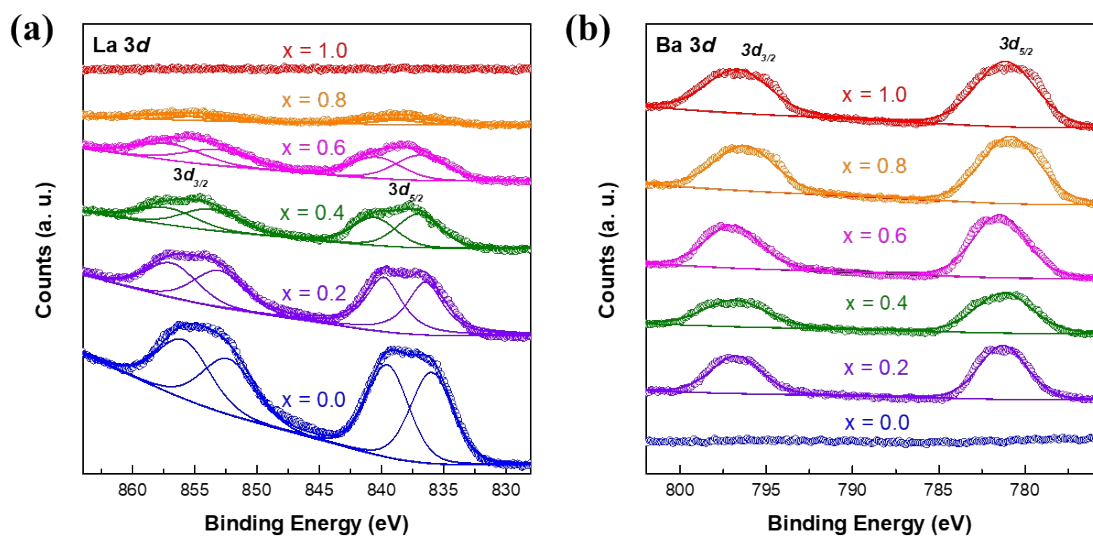

**Figure S5.** X-ray photoelectron spectra of sample  $\text{La}_{1-x}\text{Ba}_x\text{TaO}_{y+1}\text{N}_{2-y}$  ( $0 \leq x, y \leq 1$ ): (a) La 3d state; (b) Ba 3d state.



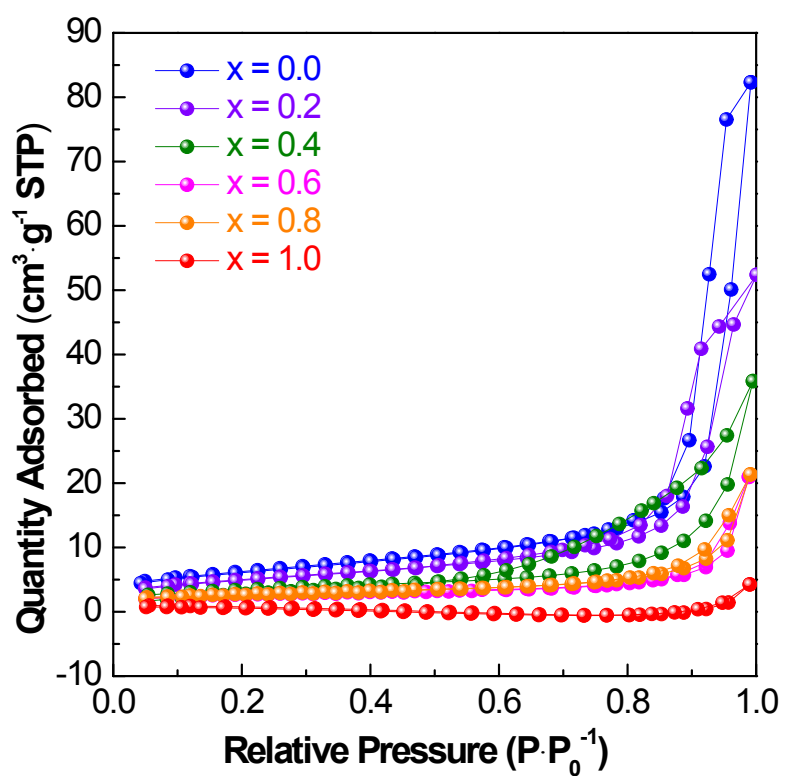

**Figure S6.** Nitrogen adsorption-desorption isotherms of freshly prepared sample powder  $\text{La}_{1-x}\text{Ba}_x\text{TaO}_{y+1}\text{N}_{2-y}$  ( $0 \leq x, y \leq 1$ ), the calculated BET surface area and FWHM of XRD are tabulated

on table S2.

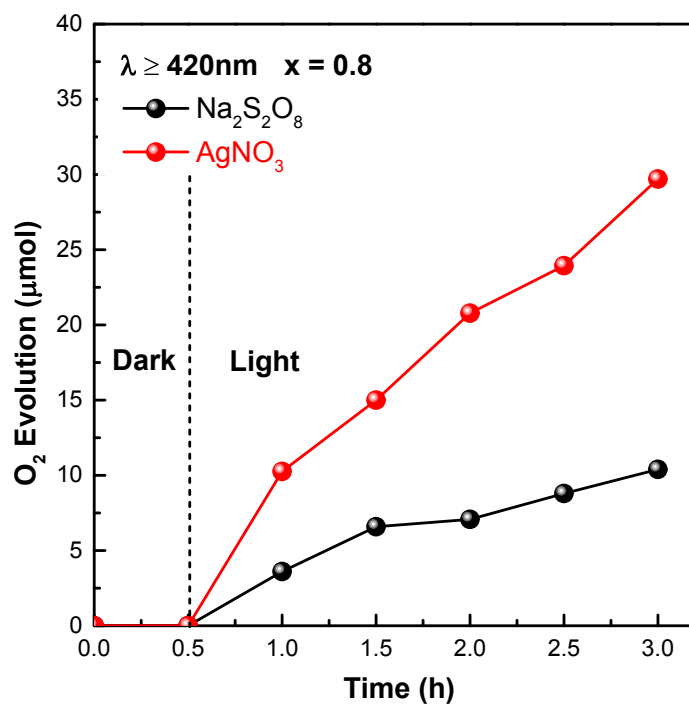

**Figure S7.** Photocatalytic oxygen evolution for  $\text{La}_{0.2}\text{Ba}_{0.8}\text{TaO}_{y+1}\text{N}_{2-y}$  ( $x = 0.8$ ) loaded with 2 wt%  $\text{CoO}_x$  under visible light illumination ( $\lambda \geq 420 \text{ nm}$ ), sodium persulfate (0.05 M) or silver nitrate aqueous solution (0.05 M) was used as a sacrificial agent.

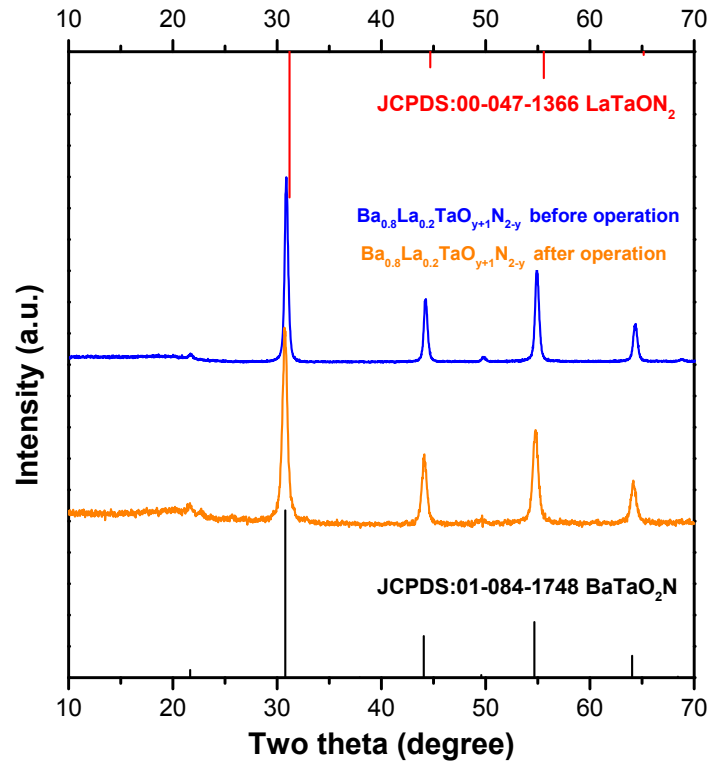

**Figure S8.** XRD pattern of  $\text{La}_{0.2}\text{Ba}_{0.8}\text{TaO}_{y+1}\text{N}_{2-y}$  ( $x = 0.8$ ) before and after oxidation treatment.

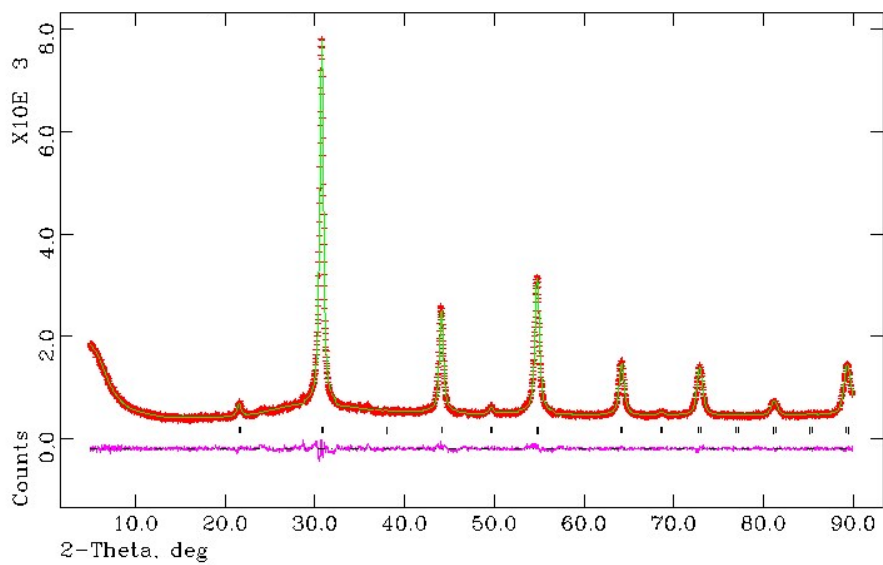

**Figure S9.** Observed and calculated XRD pattern of  $\text{La}_{0.2}\text{Ba}_{0.8}\text{TaO}_{y+1}\text{N}_{2-y}$  ( $x = 0.8$ ) after photocatalytic experiment ( $R_p = 4.05\%$ ,  $R_{wp} = 3.10\%$ ,  $\chi^2 = 1.085$ ).

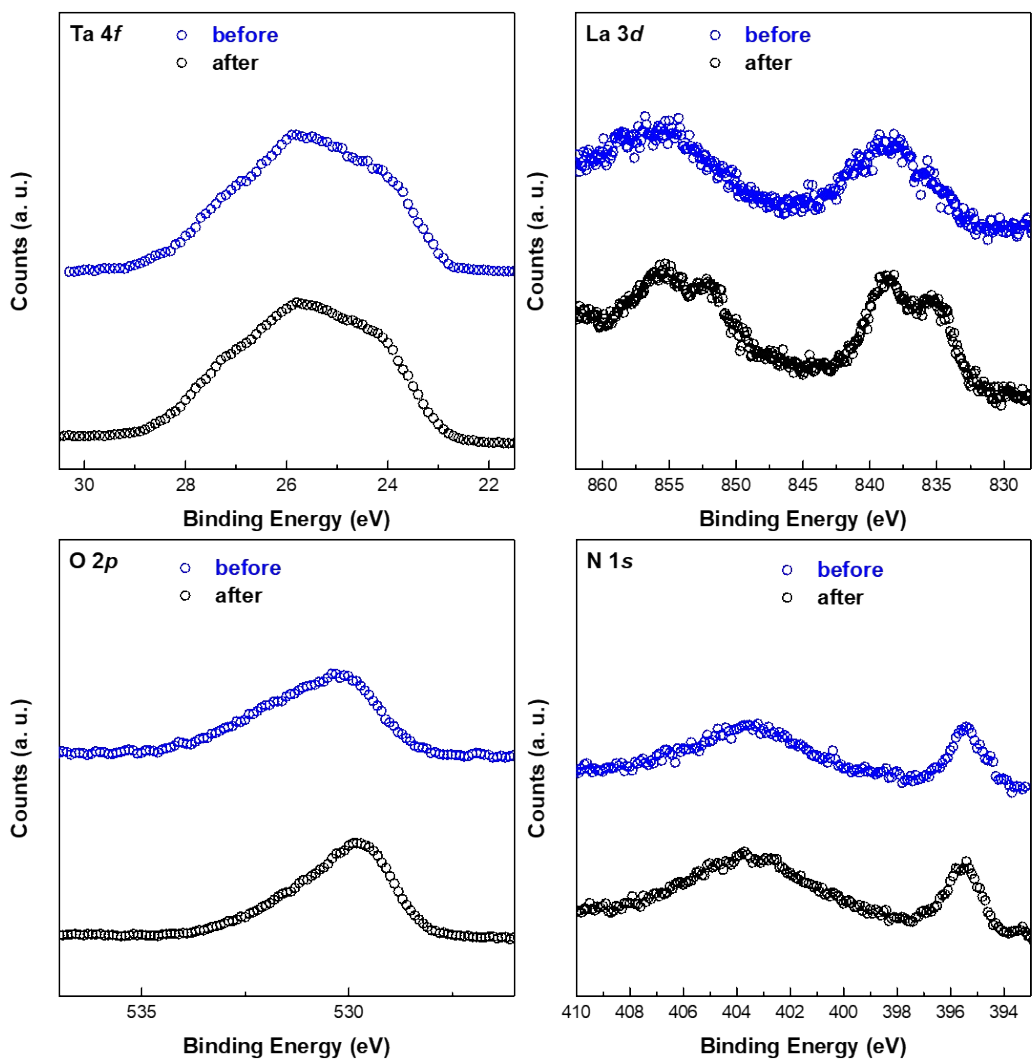

**Figure S10.** X-ray photoelectron spectra of  $\text{La}_{0.2}\text{Ba}_{0.8}\text{TaO}_{y+1}\text{N}_{2-y}$  ( $x = 0.8$ ) before and after photocatalytic experiment.

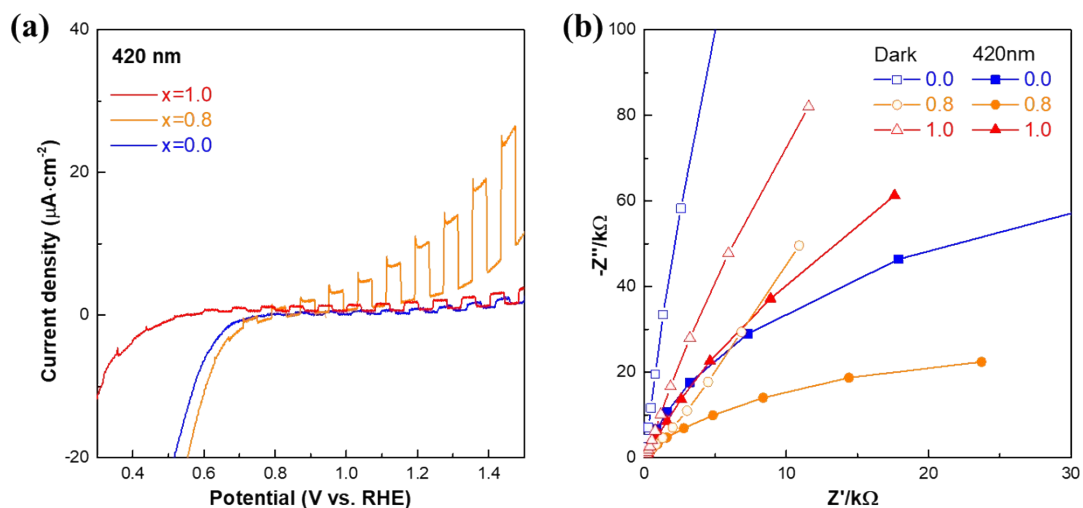

**Figure S11.** (a) Linear sweep voltammetry (LSV) and (b) impedance spectra for photoelectrode fabricated from samples  $\text{LaTaON}_2$  ( $x = 0.0$ ),  $\text{La}_{0.2}\text{Ba}_{0.8}\text{TaO}_{y+1}\text{N}_{2-y}$  ( $x = 0.8$ ) and  $\text{BaTaO}_2\text{N}$  ( $x = 1.0$ ).

**Table S1.** BET surface area and FWHM of samples  $\text{La}_{1-x}\text{Ba}_x\text{TaO}_{y+1}\text{N}_{2-y}$  ( $0 \leq x, y \leq 1$ ).

| $x$ | BET surface area (m <sup>2</sup> /g) | FWHM of main peak (°) |
|-----|--------------------------------------|-----------------------|
| 0.0 | 22.1                                 | 1.2                   |
| 0.2 | 17.8                                 | 1.1                   |
| 0.4 | 12.0                                 | 1.1                   |
| 0.6 | 8.9                                  | 0.9                   |
| 0.8 | 9.3                                  | 0.5                   |
| 1.0 | 1.8                                  | 0.2                   |

**Table S2.** Element content from oxygen and nitrogen analysis and the deduced chemical formula

| $x$ | O content (wt.%) | N content (wt.%) | Chemical formula                                                 |
|-----|------------------|------------------|------------------------------------------------------------------|
| 0.8 | 9.1              | 7.2              | $\text{La}_{0.2}\text{Ba}_{0.8}\text{TaO}_{1.67}\text{N}_{1.33}$ |

**Table S3.** XPS data on the peak fitting analysis for Ta 4f

| x   | Element state    | FWHM (eV) | Position (eV) | Area     | Position (eV) | Area     |
|-----|------------------|-----------|---------------|----------|---------------|----------|
| 0.0 | Ta <sup>4+</sup> | 1.25      | 26.07         | 26894.76 | 24.17         | 35859.68 |
|     | Ta <sup>5+</sup> | 1.86      | 27.25         | 30463.74 | 25.35         | 40618.32 |
| 0.2 | Ta <sup>4+</sup> | 1.32      | 26.12         | 24346.02 | 24.22         | 32461.36 |
|     | Ta <sup>5+</sup> | 1.60      | 27.44         | 27272.83 | 25.54         | 36363.77 |
| 0.4 | Ta <sup>4+</sup> | 1.33      | 26.10         | 11946.99 | 24.20         | 15929.32 |
|     | Ta <sup>5+</sup> | 1.86      | 27.29         | 22989.45 | 25.39         | 30652.60 |
| 0.6 | Ta <sup>4+</sup> | 1.35      | 26.17         | 19934.93 | 24.27         | 26579.91 |
|     | Ta <sup>5+</sup> | 1.65      | 27.38         | 30959.82 | 25.48         | 41279.77 |
| 0.8 | Ta <sup>4+</sup> | 1.21      | 26.15         | 8734.036 | 24.25         | 11645.38 |
|     | Ta <sup>5+</sup> | 1.87      | 27.31         | 21443.53 | 25.41         | 28591.37 |
| 1.0 | Ta <sup>4+</sup> | 1.21      | 26.32         | 6102.065 | 24.42         | 8136.086 |
|     | Ta <sup>5+</sup> | 1.85      | 27.40         | 18954.80 | 25.50         | 25273.07 |

**Table S4.** Peak positions on XPS analysis for La, Ba, Ta, O and N

| Element state    | Peak position (eV)                | Element state    | Peak position (eV)               |
|------------------|-----------------------------------|------------------|----------------------------------|
| La <sup>3+</sup> | 836.5 ( <i>3d<sub>5/2</sub></i> ) | Ta <sup>4+</sup> | 24.3 ( <i>4f<sub>7/2</sub></i> ) |
| La <sup>3+</sup> | 839.8 ( <i>3d<sub>5/2</sub></i> ) | Ta <sup>4+</sup> | 26.2 ( <i>4f<sub>5/2</sub></i> ) |
| La <sup>3+</sup> | 853.0 ( <i>3d<sub>3/2</sub></i> ) | Ta <sup>5+</sup> | 25.4 ( <i>4f<sub>7/2</sub></i> ) |
| La <sup>3+</sup> | 856.9 ( <i>3d<sub>3/2</sub></i> ) | Ta <sup>5+</sup> | 27.3 ( <i>4f<sub>5/2</sub></i> ) |
| Ba <sup>2+</sup> | 796.7 ( <i>3d<sub>3/2</sub></i> ) | OH <sup>-</sup>  | 531.6 ( <i>2p</i> )              |
| Ba <sup>2+</sup> | 781.3 ( <i>3d<sub>5/2</sub></i> ) | O <sup>2-</sup>  | 529.7 ( <i>2p</i> )              |
| N <sup>3-</sup>  | 395.6 ( <i>1s</i> )               |                  |                                  |

**Table S5.** Unit parameters for La<sub>0.2</sub>Ba<sub>0.8</sub>TaO<sub>y+1</sub>N<sub>2-y</sub> ( $x = 0.8$ ) after photocatalytic experiment, standard deviation is included in the parenthesis.

| $x$ | Space group  | $a$ (Å)   | $b$ (Å)   | $c$ (Å)   | $\beta$ (°) | B.L. (Å)  | $A$ (°) | $V$ (Å <sup>3</sup> ) |
|-----|--------------|-----------|-----------|-----------|-------------|-----------|---------|-----------------------|
| 0.8 | $Pm\bar{3}m$ | 4.1035(1) | 4.1035(1) | 4.1035(1) | 90          | 2.0518(1) | 180     | 69.099(2)             |



**Table S6.** O<sub>2</sub> evolution of some typical oxynitride and non-oxynitride photocatalysts under visible light illumination ( $\lambda \geq 420$  nm)

| Photocatalyst                                     | Co-catalyst            | O <sub>2</sub> ( $\mu\text{mol h}^{-1}$ ) | Ref. |
|---------------------------------------------------|------------------------|-------------------------------------------|------|
| LaTaON <sub>2</sub>                               | -                      | 5.0                                       | 1    |
| SrTaO <sub>2</sub> N                              | 2 wt% CoO <sub>x</sub> | 22.5                                      | 2    |
| CaTaO <sub>2</sub> N                              | -                      | 2.9                                       | 3    |
| BaNbO <sub>2</sub> N                              | 2 wt% CoO <sub>x</sub> | 15.3                                      | 4    |
| RbPb <sub>2</sub> Nb <sub>3</sub> O <sub>10</sub> | -                      | 1.3                                       | 5    |
| WO <sub>3</sub>                                   | PtO <sub>x</sub>       | 24.0                                      | 6    |
| BiVO <sub>4</sub>                                 | -                      | 15.0                                      | 7    |

**Table S7.** Photocurrent densities (1.23 V vs. RHE) of La<sub>0.2</sub>Ba<sub>0.8</sub>TaO<sub>y+1</sub>N<sub>2-y</sub> ( $x = 0.8$ ) compared with other compounds under visible light illumination ( $\lambda \geq 420$  nm)

| Photocatalyst                                                           | photocurrent density ( $\mu\text{A}$ ) | Ref.     |
|-------------------------------------------------------------------------|----------------------------------------|----------|
| La <sub>0.2</sub> Ba <sub>0.8</sub> TaO <sub>y+1</sub> N <sub>2-y</sub> | 10.4                                   | Our work |
| LaTaON <sub>2</sub>                                                     | 2.3                                    | 8        |
| CaTaO <sub>2</sub> N                                                    | 9.2                                    | 9        |
| CuWO <sub>4</sub>                                                       | ~200                                   | 10       |
| SrTaO <sub>2</sub> N                                                    | 8.6                                    | 11       |

## Reference

- 1 L. Zhang, Y. Song, J. Feng, T. Fang, Y. Zhong, Z. Li, Z. Zou, Photoelectrochemical water oxidation of LaTaON<sub>2</sub> under visible-light irradiation, *International Journal of Hydrogen Energy*, 2014, 39, 7697-7704.
- 2 J. Fu, S.E. Skrabalak, Enhanced Photoactivity from Single-Crystalline SrTaO<sub>2</sub>N Nanoplates Synthesized by Topotactic Nitridation, *Angewandte Chemie-International Edition*, 2017, 56, 14169-14173.
- 3 J. Xu, C. Pan, T. Takata, K. Domen, Photocatalytic overall water splitting on the perovskite-type transition metal oxynitride CaTaO<sub>2</sub>N under visible light irradiation, *Chemical Communications*, 2015, 51, 7191-7194.
- 4 B. Siritanaratkul, K. Maeda, T. Hisatomi, K. Domen, Synthesis and Photocatalytic Activity of Perovskite Niobium Oxynitrides with Wide Visible-Light Absorption Bands, *ChemSusChem*, 2011, 4, 74-78.
- 5 J. Yoshimura, Y. Ebina, J. Kondo, K. Domen, A. Tanaka, Visible-light induced photocatalytic behavior of a layered perovskite type niobate RbPb<sub>2</sub>Nb<sub>3</sub>O<sub>10</sub>, *Journal of Physical Chemistry*, 1993, 97, 1970-1973.
- 6 O. Tomita, S. Nitta, Y. Matsuta, S. Hosokawa, M. Higashi, R. Abe, Improved Photocatalytic Water Oxidation with Fe<sup>3+</sup>/Fe<sup>2+</sup> Redox on Rectangular-shaped WO<sub>3</sub> Particles with Specifically Exposed Crystal Faces via Hydrothermal Synthesis, *Chemistry Letters*, 2016, 46, 221-224.
- 7 W. Yao, J. Ye, A new efficient visible-light-driven photocatalyst Na<sub>0.5</sub>Bi<sub>1.5</sub>VMoO<sub>8</sub> for oxygen evolution, *Chemical Physics Letters*, 2008, 450, 370-374.
- 8 Y. Wang, S. Jin, G. Pan, Z. Li, L. Chen, G. Liu, X. Xu, Zr doped mesoporous LaTaON<sub>2</sub> for efficient photocatalytic water splitting, *Journal of Materials Chemistry A*, 2019, 7, 5702-5711.
- 9 Y. Wang, S. Wei, X. Xu, SrTaO<sub>2</sub>N-CaTaO<sub>2</sub>N solid solutions as efficient visible light active photocatalysts for water oxidation and reduction, *Applied Catalysis B-Environmental*, 2020, 263.
- 10 P. Shadabipour, A.L. Raithel, T.W. Hamann, Charge-Carrier Dynamics at the CuWO<sub>4</sub>/Electrocatalyst Interface for Photoelectrochemical Water Oxidation, *Acs Applied Materials & Interfaces*, 2020, 12, 50592-50599.
- 11 Z. Ma, K. Pietak, J. Piatek, J. R. DeMoulipe, A. Rokicinska, P. Kustrowski, R. Dronskowski, S. Zlotnik, R. H. Coridan and A. Slabon, Semi-transparent quaternary oxynitride photoanodes on GaN underlayers, *Chemical Communications*, 2020, 56, 13193-13196.
